# Supplementary material for: Multi-angle aerosol optical depth retrieval method based on improved surface reflectance
Source: Copernicus journal article supplement (doi:10.5194/amt-17-4411-2024), 2024-07-25
Supplement: Supplementary file 1 [file amt-17-4411-2024-supplement.pdf]

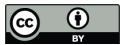

*Supplement of*

## **Multi-angle aerosol optical depth retrieval method based on improved surface reflectance**

**Lijuan Chen et al.**

*Correspondence to:* Haishan Chen ([haishan@nuist.edu.cn](mailto:haishan@nuist.edu.cn))

The copyright of individual parts of the supplement might differ from the article licence.

Table S1. MISR sensor observation angles for 9 cameras

| Camera | Observation angle |
|--------|-------------------|
| Da     | -70.5°            |
| Ca     | -60.0°            |
| Ba     | -45.6°            |
| Aa     | -26.1°            |
| An     | 0.0°              |
| Af     | 26.1°             |
| Bf     | 45.6°             |
| Cf     | 60.0°             |
| Df     | 70.5°             |

Table S2. Details of the MISR dataset used

| Number | Date     | cloud cover | Path | MISR observation angle |    |    |    |    |    |    |    |    |
|--------|----------|-------------|------|------------------------|----|----|----|----|----|----|----|----|
| 1      | 20160107 | cloudy      | 121  |                        |    | Aa | An |    |    |    | Df |    |
| 2      | 20160114 | Few clouds  | 122  |                        | Ca | Ba | Aa | An | Af | Bf | Cf | Df |
| 3      | 20160123 | cloudy      | 121  |                        | Ca |    |    |    |    | Bf | Cf | Df |
| 4      | 20160125 | Few clouds  | 119  | Da                     | Ca |    | Aa | An | Af | Bf | Cf | Df |
| 5      | 20160203 | Few clouds  | 118  |                        | Ca | Ba | Aa | An | Af | Bf | Cf | Df |
| 6      | 20160208 | Few clouds  | 121  |                        | Ca | Ba | Aa | An | Af | Bf | Cf | Df |
| 7      | 20160210 | Few clouds  | 119  | Da                     | Ca | Ba | Aa | An | Af | Bf | Cf | Df |
| 8      | 20160215 | Few clouds  | 122  | Da                     | Ca |    | Aa | An | Af | Bf | Cf | Df |
| 9      | 20160302 | Few clouds  | 122  |                        | Ca | Ba | Aa | An | Af | Bf | Cf | Df |
| 10     | 20160311 | Few clouds  | 121  |                        | Ca | Ba | Aa | An | Af | Bf | Cf | Df |
| 11     | 20160318 | Few clouds  | 122  |                        |    | Ba | Aa | An | Af | Bf | Cf |    |
| 12     | 20160430 | Few clouds  | 119  | Da                     | Ca | Ba | Aa | An | Af | Bf | Cf | Df |
| 13     | 20160505 | Few clouds  | 122  | Da                     | Ca | Ba | Aa | An | Af | Bf | Cf | Df |
| 14     | 20160516 | Few clouds  | 119  | Da                     | Ca | Ba | Aa | An | Af | Bf | Cf | Df |
| 15     | 20160530 | Few clouds  | 121  | Da                     |    |    |    | An |    | Bf | Cf | Df |
| 16     | 20160719 | Few clouds  | 119  | Da                     | Ca | Ba | Aa | An | Af | Bf | Cf | Df |
| 17     | 20160724 | Few clouds  | 122  | Da                     | Ca | Ba | Aa | An | Af | Bf | Cf | Df |
| 18     | 20160726 | Few clouds  | 120  | Da                     | Ca | Ba | Aa | An | Af | Bf | Cf | Df |
| 19     | 20160728 | Few clouds  | 118  | Da                     | Ca | Ba | Aa |    | Af | Bf | Cf | Df |
| 20     | 20160809 | cloudy      | 122  |                        |    |    |    | An | Af | Bf | Cf |    |
| 21     | 20160811 | Few clouds  | 120  | Da                     |    | Ba | Aa | An | Af | Bf | Cf |    |
| 22     | 20160825 | Few clouds  | 122  | Da                     |    | Ba | Aa | An | Af | Bf | Cf | Df |
| 23     | 20160903 | cloudy      | 121  | Da                     |    | Ba |    |    |    |    |    |    |
| 24     | 20160910 | cloudy      | 122  |                        | Ca | Ba | Aa | An | Af | Bf | Cf |    |
| 25     | 20160919 | cloudy      | 121  |                        |    | Ba | Aa | An | Af | Bf | Cf | Df |
| 26     | 20161005 | cloudy      | 121  |                        |    |    | Aa | An | Af | Bf | Cf | Df |
| 27     | 20161208 | Few clouds  | 121  |                        | Ca | Ba | Aa | An | Af | Bf | Cf | Df |

|    |          |            |     |    |    |    |    |    |    |    |    |    |
|----|----------|------------|-----|----|----|----|----|----|----|----|----|----|
| 28 | 20161215 | Few clouds | 122 |    |    | Ba | Aa | An | Af | Bf | Cf | Df |
| 29 | 20161231 | Few clouds | 122 |    |    | Ba | Aa | An | Af | Bf | Cf | Df |
| 30 | 20170125 | Few clouds | 121 |    |    |    |    | An |    |    |    |    |
| 31 | 20170226 | Few clouds | 121 | Da | Ca | Ba | Aa | An | Af | Bf | Cf | Df |
| 32 | 20170314 | Few clouds | 121 | Da | Ca | Ba | Aa | An | Af | Bf | Cf | Df |
| 33 | 20170422 | Clear Sky  | 122 | Da | Ca | Ba | Aa | An | Af | Bf | Cf | Df |
| 34 | 20170517 | Clear Sky  | 121 | Da | Ca | Ba | Aa | An | Af | Bf | Cf | Df |
| 35 | 20170602 | Few clouds | 121 | Da | Ca | Ba | Aa | An | Af | Bf | Cf | Df |
| 36 | 20170609 | cloudy     | 122 | Da | Ca | Ba | Aa | An | Af | Bf | Cf | Df |
| 37 | 20170715 | cloudy     | 118 | Da | Ca | Ba | Aa | An | Af | Bf | Cf | Df |
| 38 | 20170720 | Few clouds | 121 | Da | Ca | Ba | Aa | An | Af | Bf | Cf | Df |
| 39 | 20170722 | Few clouds | 119 | Da | Ca | Ba | Aa | An | Af | Bf | Cf | Df |
| 40 | 20171024 | Few clouds | 121 | Da | Ca | Ba | Aa | An | Af | Bf | Cf | Df |
| 41 | 20171102 | Few clouds | 120 | Da | Ca | Ba | Aa | An | Af | Bf | Cf | Df |
| 42 | 20171109 | Clear Sky  | 121 | Da | Ca | Ba | Aa | An | Af | Bf | Cf | Df |
| 43 | 20171111 | Few clouds | 119 | Da | Ca | Ba | Aa | An | Af | Bf | Cf | Df |
| 44 | 20171125 | Few clouds | 121 | Da | Ca | Ba | Aa | An | Af | Bf | Cf | Df |
| 45 | 20171127 | Few clouds | 119 | Da | Ca | Ba | Aa | An | Af | Bf | Cf | Df |
| 46 | 20171211 | Few clouds | 121 | Da | Ca | Ba | Aa | An | Af | Bf | Cf | Df |
| 47 | 20180112 | cloudy     | 121 | Da | Ca | Ba | Aa | An | Af | Bf | Cf | Df |
| 48 | 20180204 | cloudy     | 122 | Da | Ca | Ba | Aa | An | Af | Bf | Cf | Df |
| 49 | 20180213 | Clear Sky  | 121 | Da | Ca | Ba | Aa | An | Af | Bf | Cf | Df |
| 50 | 20180310 | Few clouds | 120 | Da | Ca | Ba | Aa | An | Af | Bf | Cf | Df |
| 51 | 20180328 | cloudy     | 118 | Da | Ca | Ba | Aa | An | Af | Bf | Cf | Df |
| 52 | 20180402 | Few clouds | 121 | Da | Ca | Ba | Aa | An | Af | Bf | Cf | Df |
| 53 | 20180409 | Clear Sky  | 122 | Da | Ca | Ba | Aa | An | Af | Bf | Cf | Df |
| 54 | 20180418 | Few clouds | 121 | Da | Ca | Ba | Aa | An | Af | Bf | Cf | Df |
| 55 | 20180425 | cloudy     | 122 | Da | Ca | Ba | Aa | An | Af | Bf | Cf | Df |
| 56 | 20180504 | Few clouds | 121 | Da | Ca | Ba | Aa | An | Af | Bf | Cf | Df |

|    |          |            |     |    |    |    |    |    |    |    |    |    |
|----|----------|------------|-----|----|----|----|----|----|----|----|----|----|
| 57 | 20180605 | cloudy     | 121 | Da | Ca | Ba | Aa | An | Af | Bf | Cf | Df |
| 58 | 20180612 | Few clouds | 122 | Da | Ca | Ba | Aa | An | Af | Bf | Cf | Df |
| 59 | 20180614 | Few clouds | 120 | Da | Ca | Ba | Aa | An | Af | Bf | Cf | Df |
| 60 | 20180718 | Few clouds | 118 | Da | Ca | Ba | Aa | An | Af | Bf | Cf | Df |
| 61 | 20180810 | Few clouds | 119 | Da | Ca | Ba | Aa | An | Af | Bf | Cf | Df |
| 62 | 20180824 | Few clouds | 121 | Da | Ca | Ba | Aa | An | Af | Bf | Cf | Df |
| 63 | 20180904 | Few clouds | 118 | Da | Ca | Ba | Aa | An | Af | Bf | Cf | Df |
| 64 | 20180909 | Few clouds | 121 | Da | Ca | Ba | Aa | An | Af | Bf | Cf | Df |
| 65 | 20181006 | cloudy     | 118 | Da | Ca | Ba | Aa | An | Af | Bf | Cf | Df |
| 66 | 20181011 | Clear Sky  | 121 | Da | Ca | Ba | Aa | An | Af | Bf | Cf | Df |
| 67 | 20181029 | Clear Sky  | 119 | Da | Ca | Ba | Aa | An | Af | Bf | Cf | Df |
| 68 | 20181214 | cloudy     | 121 | Da | Ca | Ba | Aa | An | Af | Bf | Cf | Df |

Note: The Taihu site is located on path 118 and 119, and Xuzhou-CUMT site is located on path 120, 121 and 122.

Table S3. Values of MISR AOD at 9 angles in previous study (Chen et al., 2021)

| Site        | Camera angle | MISR AOD | AERONET AOD | Difference in AOD |
|-------------|--------------|----------|-------------|-------------------|
| Taihu       | Da           | 0.7431   | 0.3795      | 0.3635            |
|             | Ca           | 0.7067   | 0.3795      | 0.3272            |
|             | Ba           | 0.5991   | 0.3795      | 0.2195            |
|             | Aa           | 0.6327   | 0.3795      | 0.2532            |
|             | An           | 0.8138   | 0.3795      | 0.4342            |
|             | Af           | 0.5959   | 0.3795      | 0.2164            |
|             | Bf           | 0.5491   | 0.3795      | 0.1696            |
|             | Cf           | 0.5467   | 0.3795      | 0.1672            |
|             | Df           | 0.5341   | 0.3795      | 0.1546            |
| Xuzhou-CUMT | Da           | 0.8766   | 0.4787      | 0.3979            |
|             | Ca           | 0.8556   | 0.4787      | 0.3769            |
|             | Ba           | 0.8269   | 0.4787      | 0.3482            |
|             | Aa           | 0.8853   | 0.4787      | 0.4066            |
|             | An           | 0.8895   | 0.4787      | 0.4108            |
|             | Af           | 0.6703   | 0.4787      | 0.1916            |
|             | Bf           | 0.6703   | 0.4787      | 0.1916            |
|             | Cf           | 0.6416   | 0.4787      | 0.1629            |
|             | Df           | 0.6013   | 0.4787      | 0.1227            |

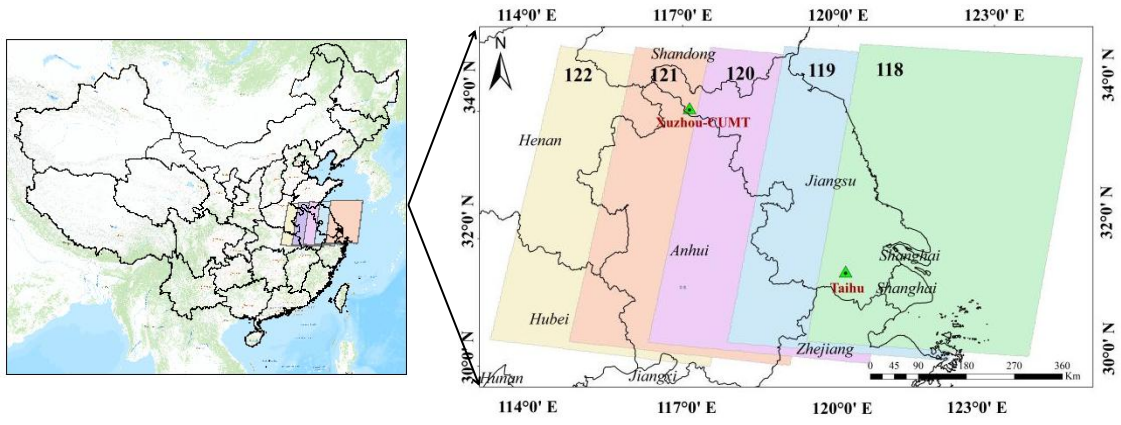

Figure S1. Overview map of the research area

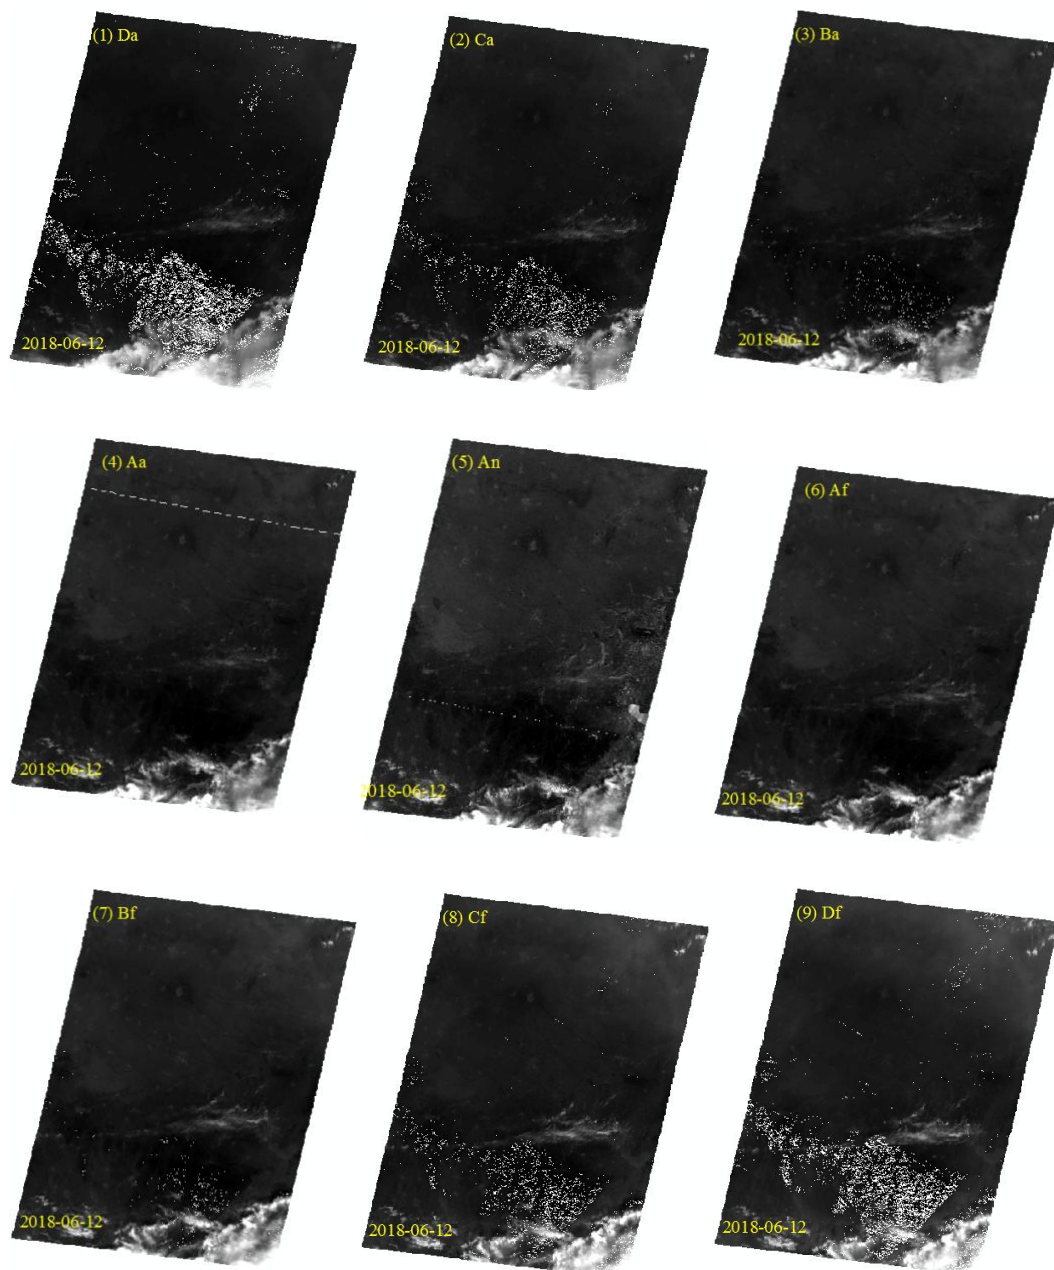

Figure S2. MISR image radiation data on June 12, 2018

(The white dots present in the Aa angle image are flash points generated by the sensor)



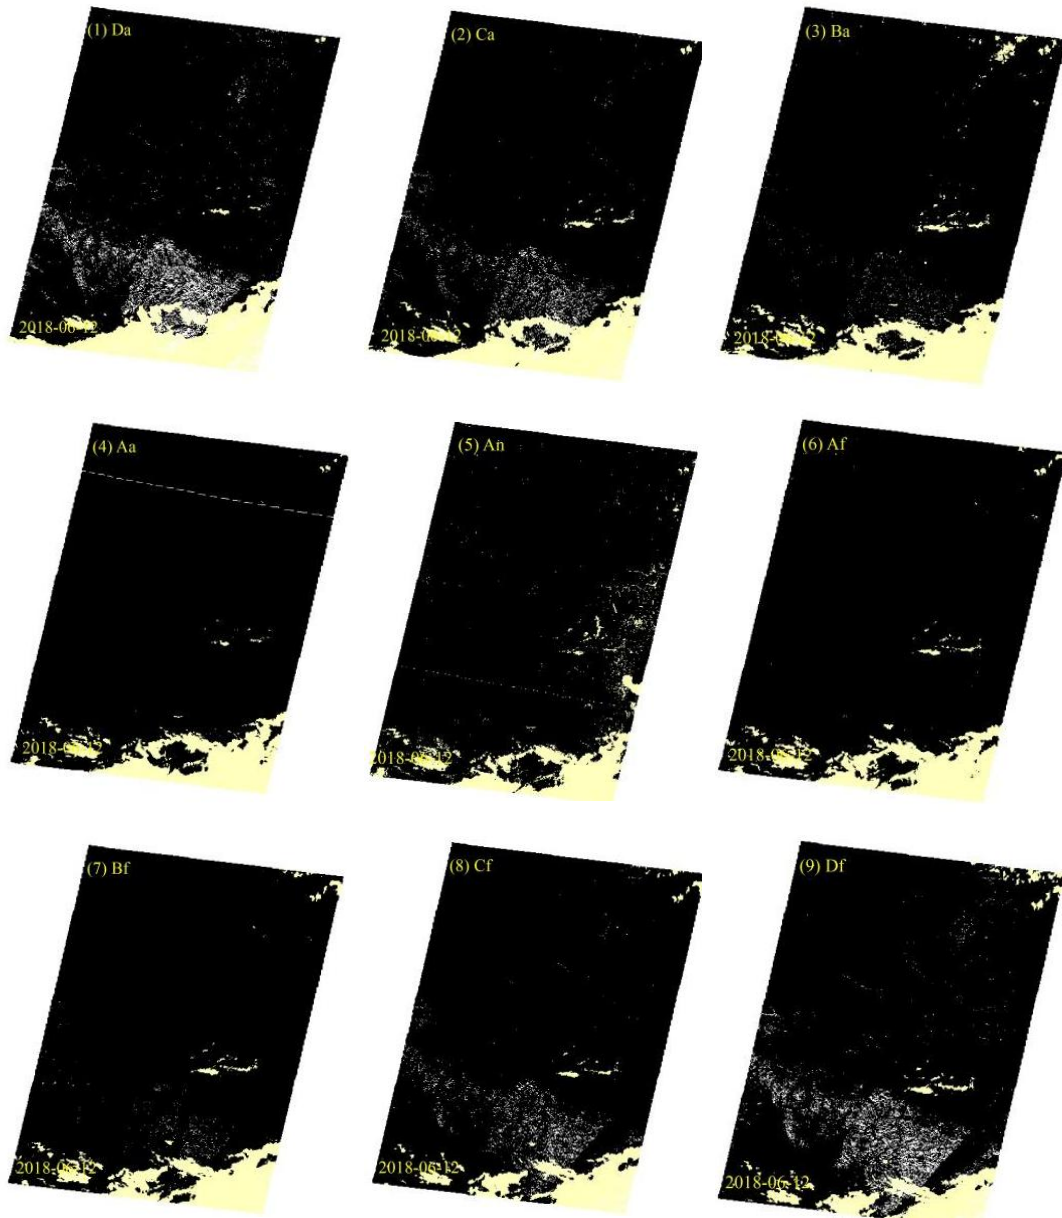

Figure S3. MISR Image Cloud Mask Results on June 12, 2018

(The white spots present in the Aa angle image are caused by flashing points caused by the sensor. Yellow represents the recognized cloud pixels)
